# Supplementary material
Source: PubMed Central journal article supplement (PMC4010119)

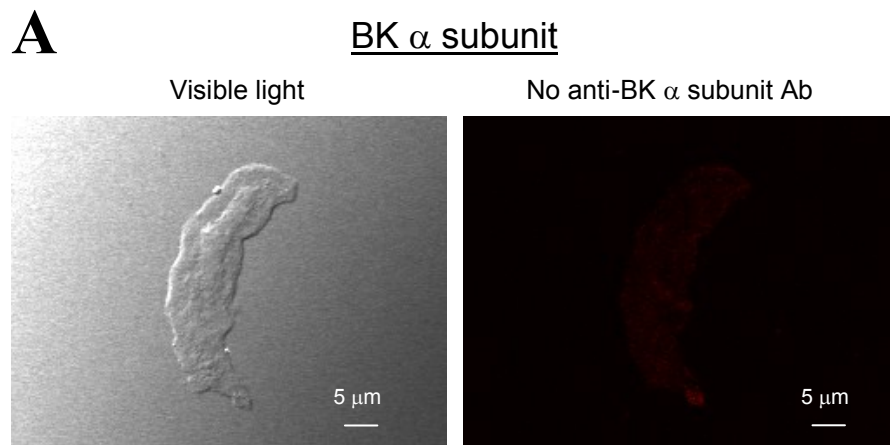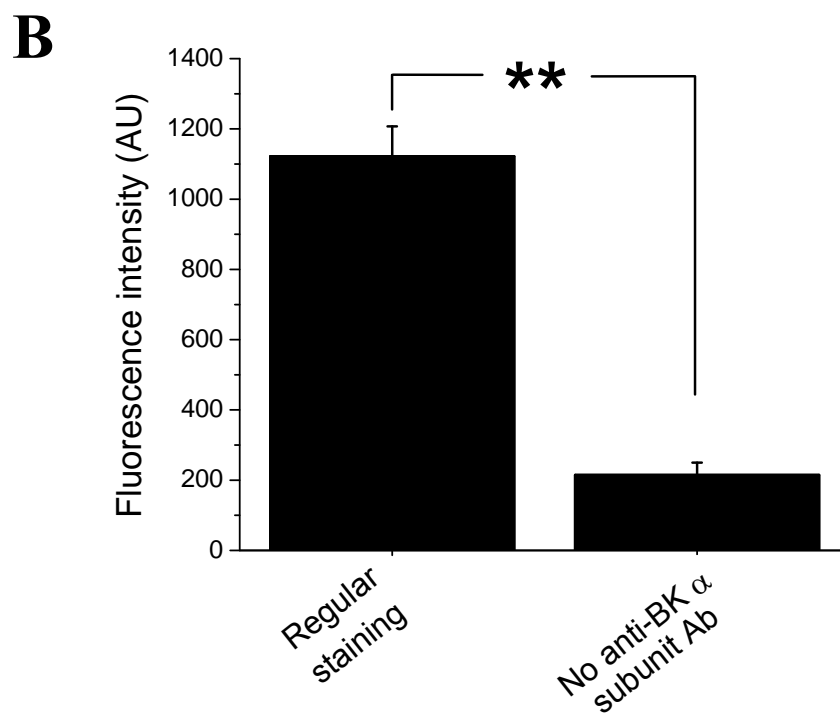

*Figure S1*

**A****BK  $\beta$ 1 subunit**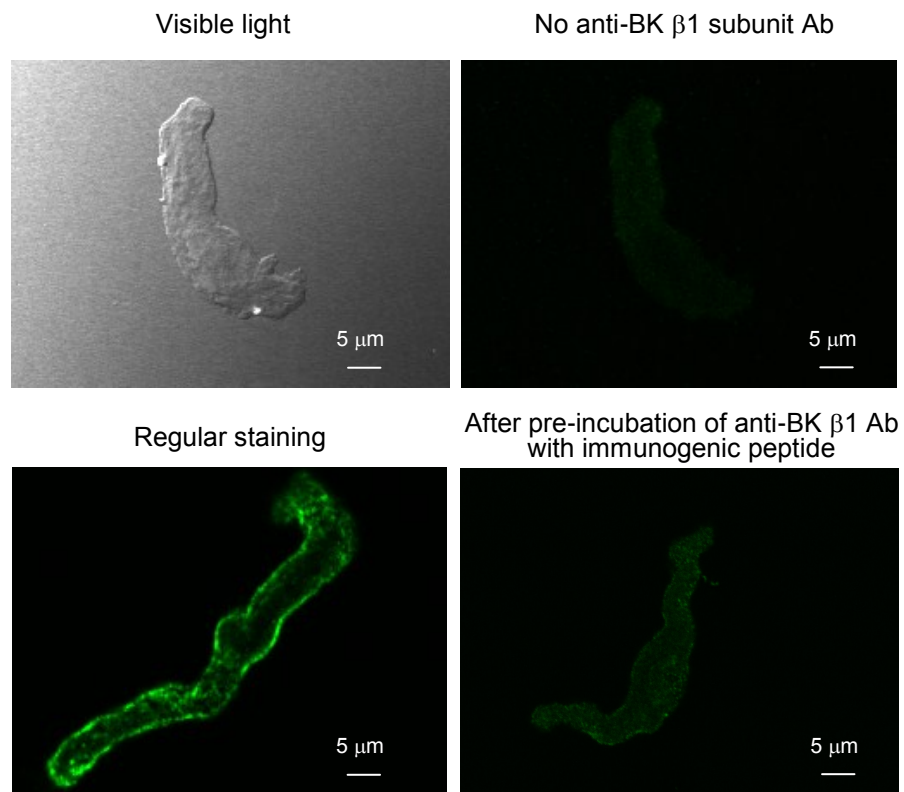**B**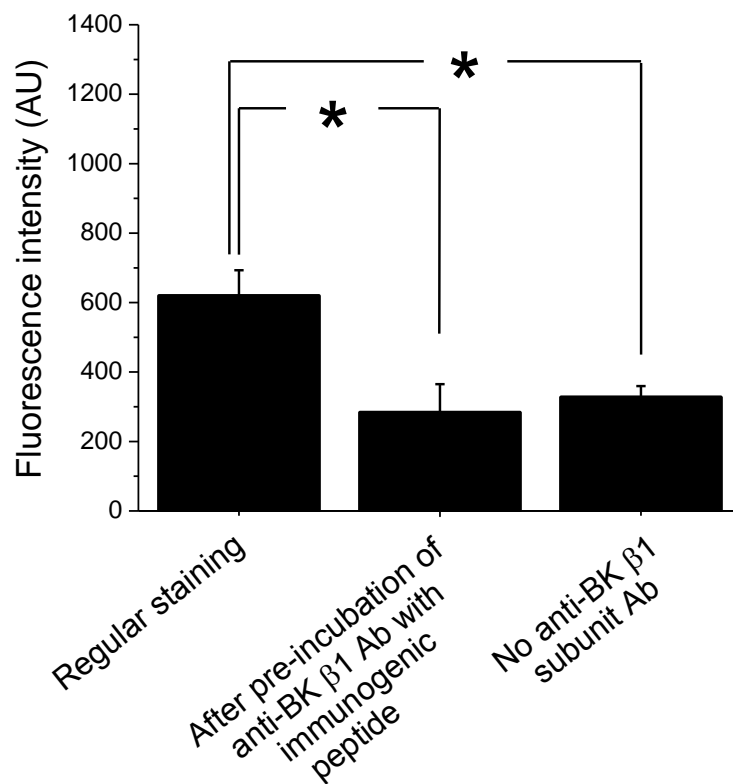*Figure S2*

Supplement: NIHMS567034-supplement-Supp_Fig_S1-S2.pdf [file NIHMS567034-supplement-Supp_Fig_S1-S2.pdf]
